# Supplementary material for: The Photoperiod Regulates Granulosa Cell Apoptosis through the FSH-Nodal/ALK7 Signaling Pathway in Phodopus sungorus
Source: MDPI journal article supplement (doi:10.3390/ani12243570), 2022-12-16
Supplement: s1 [file s1]

**Supplementary Materials**

**Table S1.** Detailed information of Immunofluorescence co-localization antibody.

| Antibody                                      | Dilutions | Catalog number | Biotechnology Co., Ltd. |
|-----------------------------------------------|-----------|----------------|-------------------------|
| rabbit anti-Nodal antibody                    | 1:2000    | bs-12243R      | Bioss                   |
| HRP-labeled Goat Anti-Rabbit IgG              | 1:500     | GB23303        | Servicebio              |
| ACVR1C rabbit polyclonal antibody             | 1:200     | 12610-1-AP     | Proteintech             |
| Alexa Fluor® 488 labeled goat anti-rabbit IgG | 1:400     | GB25303        | Servicebio              |

**Table S2.** Fluorescence quantitative primers sequences and related information.

| Primer         | Primer sequences                                                         | Product Length (bp) | Annealing temperature (°C) |
|----------------|--------------------------------------------------------------------------|---------------------|----------------------------|
| <i>Nodal</i>   | F:5'-TGTAGGAGGGTCAAGTTCCAGGTG-3'<br>R:5'-CATCCACATTCTCCACAAC-3'          | 88                  | 60                         |
| <i>ALK7</i>    | F:5'-GGAGATCGTTGGTACTCAAGGTAAGC-3'<br>R:5'-GTTTCACAGCCAGCCCTAAGTCAG-3'   | 119                 | 60                         |
| <i>XIAP</i>    | F:5'-GGTCAGAGCACAGGAGACACTTTC-3'<br>R:5'-CTGAACTCACACCAGACTCACTTCG-3'    | 87                  | 60                         |
| <i>Smad4</i>   | F:5'-TCTTCAGCACCACCCGCCTATG-3'<br>R:5'-GAACACCAATACTCAGGAGCAGGATG-3'     | 114                 | 61                         |
| <i>Akt</i>     | F:5'-CGCTTCTTTGCCAACATCGTGTG-3'<br>R:5'-CTCATCGAAATACCTGGTGTCAGTCTC-3'   | 105                 | 61                         |
| <i>DIABO</i>   | F:5'-CTCCACCTTTCTGTCCCAAACCAC-3'<br>R:5'-CTGCCACACTTCATCTTCCTCCTG-3'     | 148                 | 61                         |
| <i>HtrA2</i>   | F:5'-CTGGTCTTCGGCCTGGTGAT-3'<br>R:5'-ACTGCCAGCTGTGATTGGGT-3'             | 103                 | 60                         |
| <i>Bax</i>     | F:5'-TGCTACAGGGTTTCATCCA-3'<br>R:5'-GGCACTCGCTCAACTTCT-3'                | 111                 | 54                         |
| <i>Bcl2</i>    | F:5'-TGTGGATGACCGAGTACCTGAACC-3'<br>R:5'-AGACAGCCAAGAGAAATCAAACAGAGG-3'  | 125                 | 61                         |
| <i>Bcl-xL</i>  | F:5'-CTGTGTGGAAAGCGTAGACAAGGAG-3'<br>R:5'-AAGGCTCTAGGTGGTCATTTCAGGTAG-3' | 92                  | 60                         |
| <i>β-actin</i> | F:5'-GAGACCTTCAACACCCCAGC-3'<br>R:5'-ATGTCACGCACGATTTCCC-3'              | 263                 | 59                         |

**Table S3.** Detailed information of western blotting antibody.

| Antibody                                         | Dilutions | Catalog number | Biotechnology Co., Ltd.  |
|--------------------------------------------------|-----------|----------------|--------------------------|
| Nodal rabbit polyclonal antibody                 | 1:1000    | DF7791         | Affinity Biosciences     |
| ACVR1C rabbit polyclonal antibody                | 1:1000    | 12610-1-AP     | Proteintech              |
| Smad4 rabbit polyclonal antibody                 | 1:1000    | 10231-1-AP     | Proteintech              |
| XIAP rabbit antibody                             | 1:1000    | AF6368         | Affinity Biosciences     |
| Akt rabbit Polyclonal antibody                   | 1:1000    | 10176-2-AP     | Proteintech              |
| DIABLO rabbit polyclonal antibody                | 1:1000    | 10434-1-AP     | Proteintech              |
| HtrA2 rabbit polyclonal antibody                 | 1:1000    | 15775-1-AP     | Proteintech              |
| Bax rabbit polyclonal antibody                   | 1:5000    | 50599-1-AP     | Proteintech              |
| Bcl2 rabbit Polyclonal antibody                  | 1:1000    | 26593-1-AP     | Proteintech              |
| Bcl-xL rabbit polyclonal antibody                | 1:1000    | 10783-1-AP     | Proteintech              |
| Beta actin rabbit polyclonal antibody            | 1:2000    | 20536-1-AP     | Proteintech              |
| GAPDH rabbit polyclonal antibody                 | 1:2000    | 10494-1-AP     | Proteintech              |
| Alpha Tubulin rabbit polyclonal antibody         | 1:2000    | 11224-1-AP     | Proteintech              |
| IRDye 800 CW goat anti-rabbit secondary antibody | 1:5000    | 31460          | Thermo Fisher Scientific |

**Table S4.** Numbers of growing follicles in each section under different photoperiods with the same magnification.

| Slice number | SD | MD | LD |
|--------------|----|----|----|
| 1-1          | 1  | 2  | 8  |
| 1-2          | 2  | 1  | 2  |
| 1-3          | 2  | 2  | 3  |
| 2-1          | 1  | 3  | 6  |
| 2-2          | 1  | 1  | 6  |
| 2-3          | 3  | 1  | 1  |
| 3-1          | 0  | 3  | 7  |
| 3-2          | 2  | 3  | 5  |
| 3-3          | 2  | 2  | 4  |
| 4-1          | 4  | 3  | 4  |
| 4-2          | 3  | 3  | 2  |
| 4-3          | 4  | 2  | 2  |
| 5-1          | 3  | 5  | 6  |
| 5-2          | 3  | 3  | 4  |
| 5-3          | 3  | 3  | 4  |
| 6-1          | 1  | 1  | 7  |
| 6-2          | 0  | 3  | 8  |
| 6-3          | 0  | 2  | 5  |

|      |       |       |       |
|------|-------|-------|-------|
| Mean | 1.945 | 2.389 | 4.667 |
|------|-------|-------|-------|

**Table S5.** Numbers of antral follicles in each section under different photoperiods with the same magnification.

| Slice number | SD | MD | LD |
|--------------|----|----|----|
| 1-1          | 0  | 1  | 1  |
| 1-2          | 0  | 0  | 1  |
| 1-3          | 0  | 1  | 1  |
| 2-1          | 0  | 1  | 4  |
| 2-2          | 0  | 0  | 4  |
| 2-3          | 1  | 0  | 3  |
| 3-1          | 0  | 1  | 2  |
| 3-2          | 0  | 1  | 2  |
| 3-3          | 0  | 0  | 0  |
| 4-1          | 0  | 0  | 0  |
| 4-2          | 0  | 0  | 0  |
| 4-3          | 1  | 01 | 0  |
| 5-1          | 0  | 11 | 0  |
| 5-2          | 0  | 1  | 0  |
| 5-3          | 0  | 1  | 2  |
| 6-1          | 0  | 0  | 2  |
| 6-2          | 0  | 0  | 3  |

|      |       |       |       |
|------|-------|-------|-------|
| 6-3  | 0     | 0     | 0     |
| Mean | 0.056 | 0.444 | 1.167 |

**Table S6.** Numbers of atretic follicles in each section under different photoperiods with the same magnification.

| Slice number | SD | MD | LD |
|--------------|----|----|----|
| 1-1          | 2  | 0  | 1  |
| 1-2          | 2  | 1  | 0  |
| 1-3          | 5  | 2  | 0  |
| 2-1          | 2  | 2  | 0  |
| 2-2          | 3  | 1  | 0  |
| 2-3          | 3  | 1  | 2  |
| 3-1          | 4  | 2  | 1  |
| 3-2          | 3  | 2  | 1  |
| 3-3          | 4  | 2  | 0  |
| 4-1          | 2  | 0  | 1  |
| 4-2          | 2  | 0  | 1  |
| 4-3          | 2  | 2  | 1  |
| 5-1          | 1  | 2  | 1  |
| 5-2          | 1  | 3  | 1  |
| 5-3          | 1  | 2  | 0  |
| 6-1          | 3  | 1  | 1  |

---

|      |       |       |       |
|------|-------|-------|-------|
| 6-2  | 4     | 1     | 1     |
| 6-3  | 5     | 1     | 0     |
| Mean | 2.722 | 1.389 | 0.667 |

---
